# Supplementary material
Source: PubMed Central journal article supplement (PMC2722227)
Supplement: ddn423_1.pdf [file ddn423_1.pdf]

## **Legends to Supplementary Figures:**

**Supplementary Figure 1: Histopathology of NPC1 single null and NPC1/tau double null mutant mice.** Purkinje cell loss in cerebellar folia and accumulation of lipid-laden macrophages in liver of 10-week-old NPC1 single null and NPC1/tau double null mutant mice. (H&E stain, original magnification 200 x.)

**Supplementary Figure 2: Cerebellar pathology in NPC1 single null and NPC1/tau double null mutant mice.** Immunohistochemical stain for phosphorylated neurofilament protein (SMI-31) highlights swollen axons in cerebellar white matter of mutant mice. Astrogliosis (GFAP) and microgliosis (Iba1) are visualized in cerebellum of 10-week-old mutants. (Original magnification 200 X, except neurofilament stain at 4 weeks, which is shown at 400 x.)

**Supplementary Figure 3: LC3-positive swollen axons in cerebellar white matter of NPC1 single null and NPC1/tau double null mutant mice.** Arrows indicate LC3 immunoreactive swollen axons in cerebellar white matter of mutant mice. (Original magnification 1000 x.)

Cerebellum

Liver

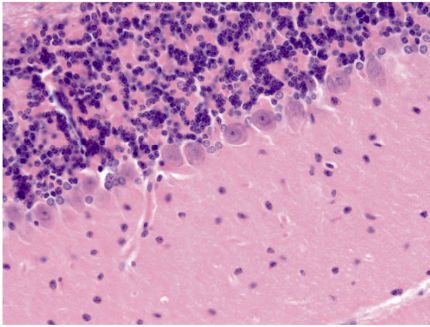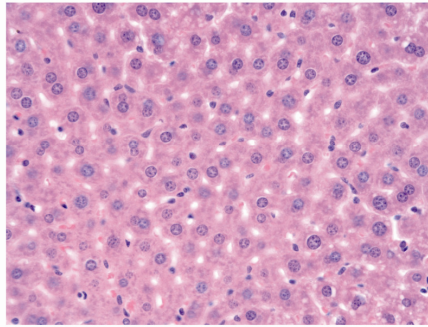

wild type

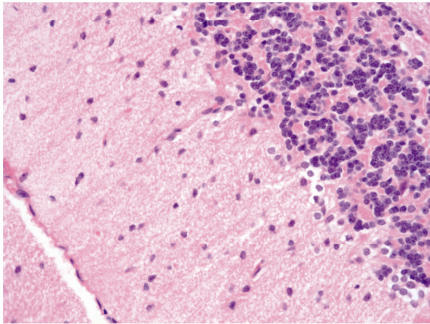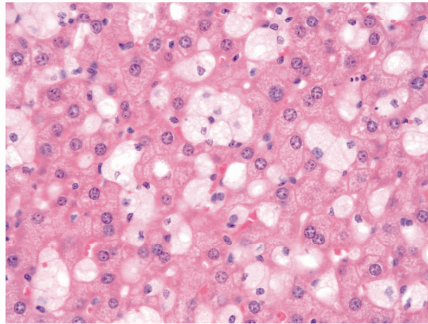

*Npc1* -/-

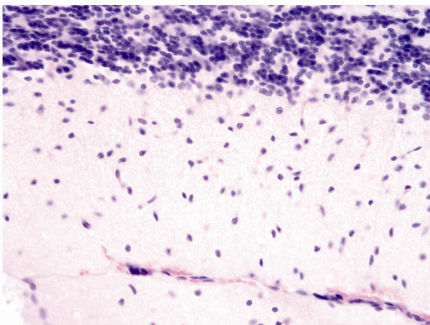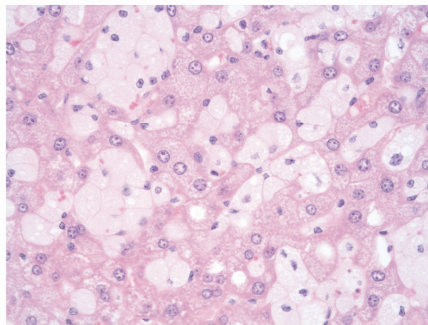

*Npc1* -/-,  
*Mapt* -/-

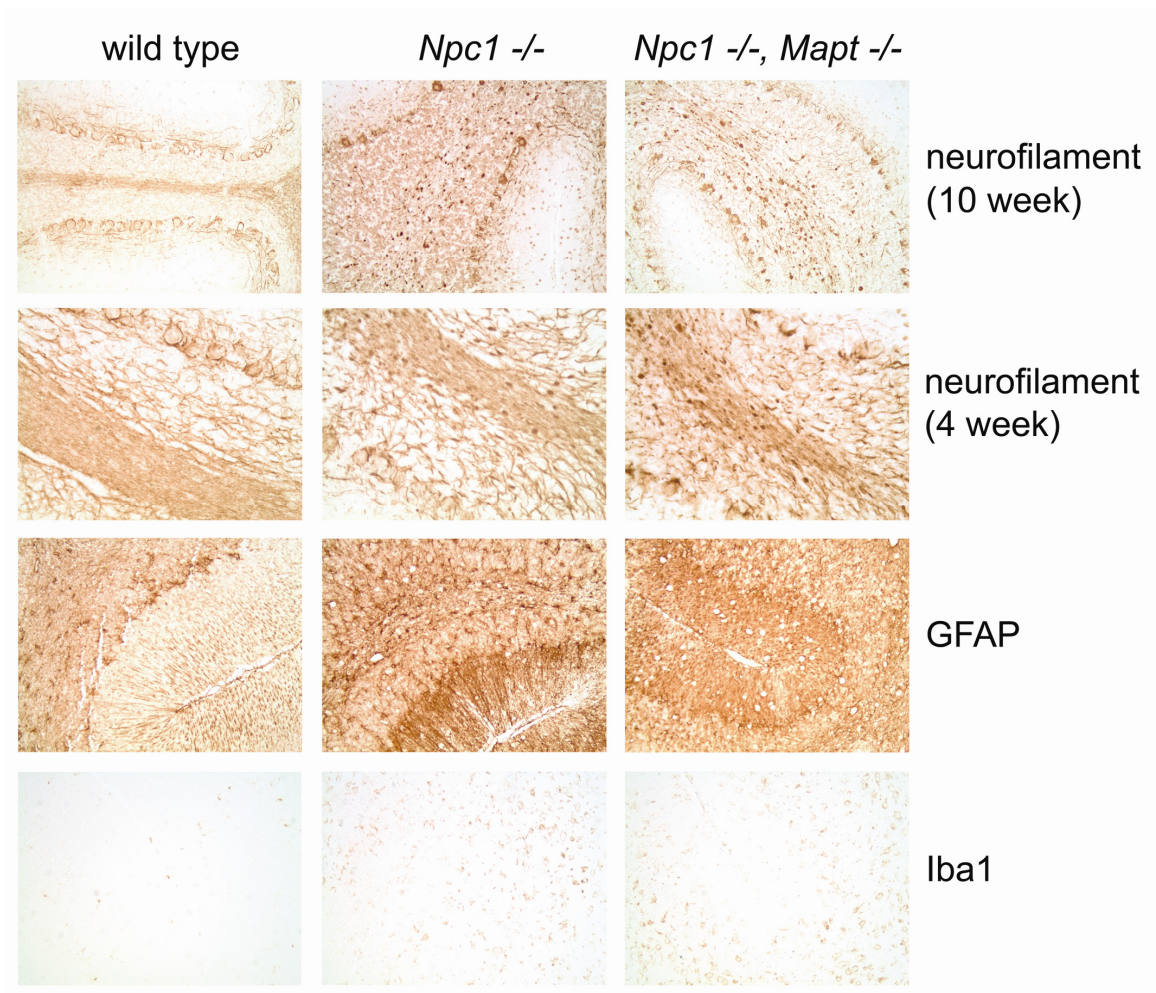

*Npc1* *-/-*

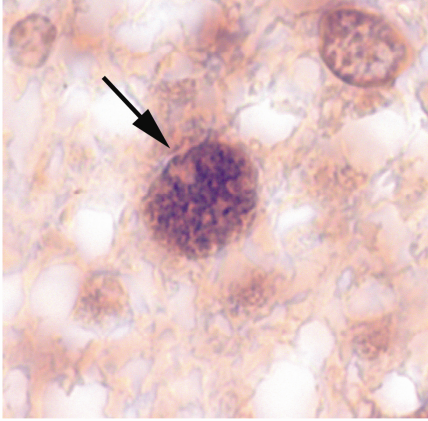

*Npc1* *-/-*  
*Mapt* *-/-*

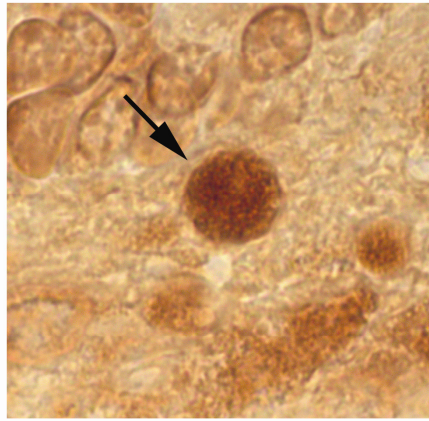

LC3
